# Supplementary material for: Male reproductive cycle in a population of the endemic butterfly lizard, Leiolepis ocellata Peters, 1971 (Squamata: Agamidae) from northern Thailand
Source: BMC Zool. 2022 Aug 5;7:45. doi: 10.1186/s40850-022-00145-6 (PMC10127433; doi:10.1186/s40850-022-00145-6)
Supplement: Supplementary file 2 — Additional file 2. [file 40850_2022_145_MOESM2_ESM.docx]

**Male reproductive cycle in a population of the endemic butterfly lizard, *Leiolepis ocellata* Peters, 1971 (Squamata: Agamidae) from northern Thailand**

Akkanee Pewhom1,Thidaporn Supapakorn2 andNopparat Srakaew3,*

1Department of Biology, Faculty of Science, Thaksin University, Phatthalung, 93210, Thailand

2Department of Statistics, Faculty of Science, Kasetsart University, Bangkok, 10900, Thailand

3Department of Zoology, Faculty of Science, Kasetsart University, Bangkok, 10900, Thailand

*****Correspondence: Nopparat Srakaew (E-mail: fscinrsr@ku.ac.th)

**Additional file 2.** Supplementary figures of microanatomy of the testes and male genital ducts of the butterfly lizard, *Leiolepis ocellata*.

**Figure legends**

**Fig. S1** Microscopic structures of the testes at different reproductive periods. **A** Early first active period (EFA). **B** First active period (FA). **C** Resting period (R). **D** Second recrudescent period (SR). **E** Second active period (SA). **F** Regressive period (Rg). **G** Quiescent period (Q). **H** First recrudescent period (FR). Photomicrographs are specified with their corresponding reproductive period at the top-right corner. Abbreviations: ES, elongating and elongated spermatid; FV, fat vacuoles; LC, Leydig cell; PS, primary spermatocyte; RC, residual round germ cell; RS, round spermatid; Se, Sertoli cell; Sg, spermatogonium; SS, secondary spermatocyte; Sz, spermatozoa. Stains: A = PAS−H; B, D, G, H = H&E; C, E, F = Masson’s trichrome.

**Fig. S2** Microanatomical structures of the rete testis of *Leiolepis ocellata* during the annual reproductive cycle. **A** Early first active period (EFA). **B** First active period (FA). **C** Resting period (R). **D** Second recrudescent period (SR). **E** Second active period (SA). **F** Regressive period (Rg). **G** Quiescent period (Q). **H** First recrudescent period (FR). Photomicrographs are designated with their corresponding reproductive periods at the top-right corner. Abbreviations: RC, residual round germ cell; Sz, spermatozoa. Stains: A = PAS−H; B, C, G = H&E; D, F, H = Masson’s trichrome; E = AB pH 2.5–NR.

**Fig. S3** Microanatomy of the proximal ductuli efferentes of *Leiolepis ocellata* during the annual reproductive cycle. Reproductive periods are indicated at the top-right corner of their corresponding photomicrographs. Abbreviations: EFA, early first active period; FA, first active period; FR, first recrudescent period; Pi, pigment cell; Q, quiescent period; R, resting period; Rg, regressive period; SA, second active period; SR, second recrudescent period; Sz, spermatozoa. Stains: A, G = PAS−H; B = BB; C, E = AB pH 1.0–NR; D = H&E; F, H = Masson’s trichrome.

**Fig. S4** Histological structures of the distal ductuli efferentes of *Leiolepis ocellata* during the annual reproductive cycle. Micrographs are labeled at the top-right corner with their corresponding reproductive periods. Abbreviations: EFA, early first active period; FA, first active period; FR, first recrudescent period; Q, quiescent period; R, resting period; Rg, regressive period; SA, second active period; SR, second recrudescent period; Sz, spermatozoa. Stains: A, D, E = Masson’s trichrome; B, C, G = BB; F, H = PAS−H.

**Fig. S5** Histology of the initial segment of the epididymis of *Leiolepis ocellata* during the annual reproductive cycle. Photomicrographs are indicated at the top-right corner with their corresponding reproductive periods. Abbreviations: EFA, early first active period; FA, first active period; FR, first recrudescent period; Q, quiescent period; R, resting period; RC, residual round germ cell; Rg, regressive period; SA, second active period; SR, second recrudescent period; Sz, spermatozoa. Stains: A, C, E = Masson’s trichrome; B, G = BB; D = H&E; F = PAS−H; H = AB pH 1.0–NR.

**Fig. S6** Microscopic structures of the caput epididymis of *Leiolepis ocellata* during the annual reproductive cycle. Photomicrographs are labeled at the top-right corner with their corresponding reproductive periods. Abbreviations: EFA, early first active period; FA, first active period; FR, first recrudescent period; Q, quiescent period; R, resting period; Rg, regressive period; RC, residual round germ cell; SA, second active period; SR, second recrudescent period; Sz, spermatozoa. Stains: A, D, G = PAS−H; B, E, F = Masson’s trichrome; C = AB pH 1.0–NR; H = BB.

**Fig. S7** Histological structures of the corpus epididymis of *Leiolepis ocellata* during the annual reproductive cycle. Reproductive periods are specified at the top-right corner of their corresponding micrographs. Abbreviations: EFA, early first active period; FA, first active period; FR, first recrudescent period; Q, quiescent period; R, resting period; Rg, regressive period; RC, residual round germ cell; SA, second active period; SG, secretory granule; SR, second recrudescent period; Sz, spermatozoa. Stains: A, G = PAS−H; B = BB; C, D, E, H = AB pH 1.0–NR; F = Masson’s trichrome.

**Fig. S8** Microanatomical structures of the cauda epididymis of *Leiolepis ocellata* during the annual reproductive cycle. Photomicrographs are designated at the top-right corner with their corresponding reproductive periods. Abbreviations: EFA, early first active period; FA, first active period; FR, first recrudescent period; Q, quiescent period; R, resting period; Rg, regressive period; RC, residual round germ cell; SA, second active period; SG, secretory granule; SR, second recrudescent period; Sz, spermatozoa. Stains: A, F = Masson’s trichrome; B, C, D, E, G = PAS−H; H = BB.

**Fig. S9** Microanatomy of the ductal portion of the ductus deferens during the annual reproductive cycle. Reproductive periods are shown at the top-right corner of their corresponding photomicrographs. Abbreviations: EFA, early first active period; FA, first active period; FR, first recrudescent period; Q, quiescent period; R, resting period; RC, residual round germ cell; Rg, regressive period; SA, second active period; SG, secretory granule; SR, second recrudescent period; Sz, spermatozoa. Stains: A, B, C, H = H&E; D = BB; E, F, G = PAS−H.

**Fig. S10** Histology of the ampulla portion of the ductus deferens during the annual reproductive cycle. Photomicrographs are specified with their corresponding reproductive periods at the top-right corner. Abbreviations: EFA, early first active period; FA, first active period; FR, first recrudescent period; MF, mucosal fold; Q, quiescent period; R, resting period; RC, residual round germ cell; Rg, regressive period; SA, second active period; SG, secretory granule; SR, second recrudescent period; Sz, spermatozoa. Stains: A, H = PAS−H; B, G = H&E; C, E = AB pH 2.5–NR; D = AB pH 1.0–NR; F = Masson’s trichrome.


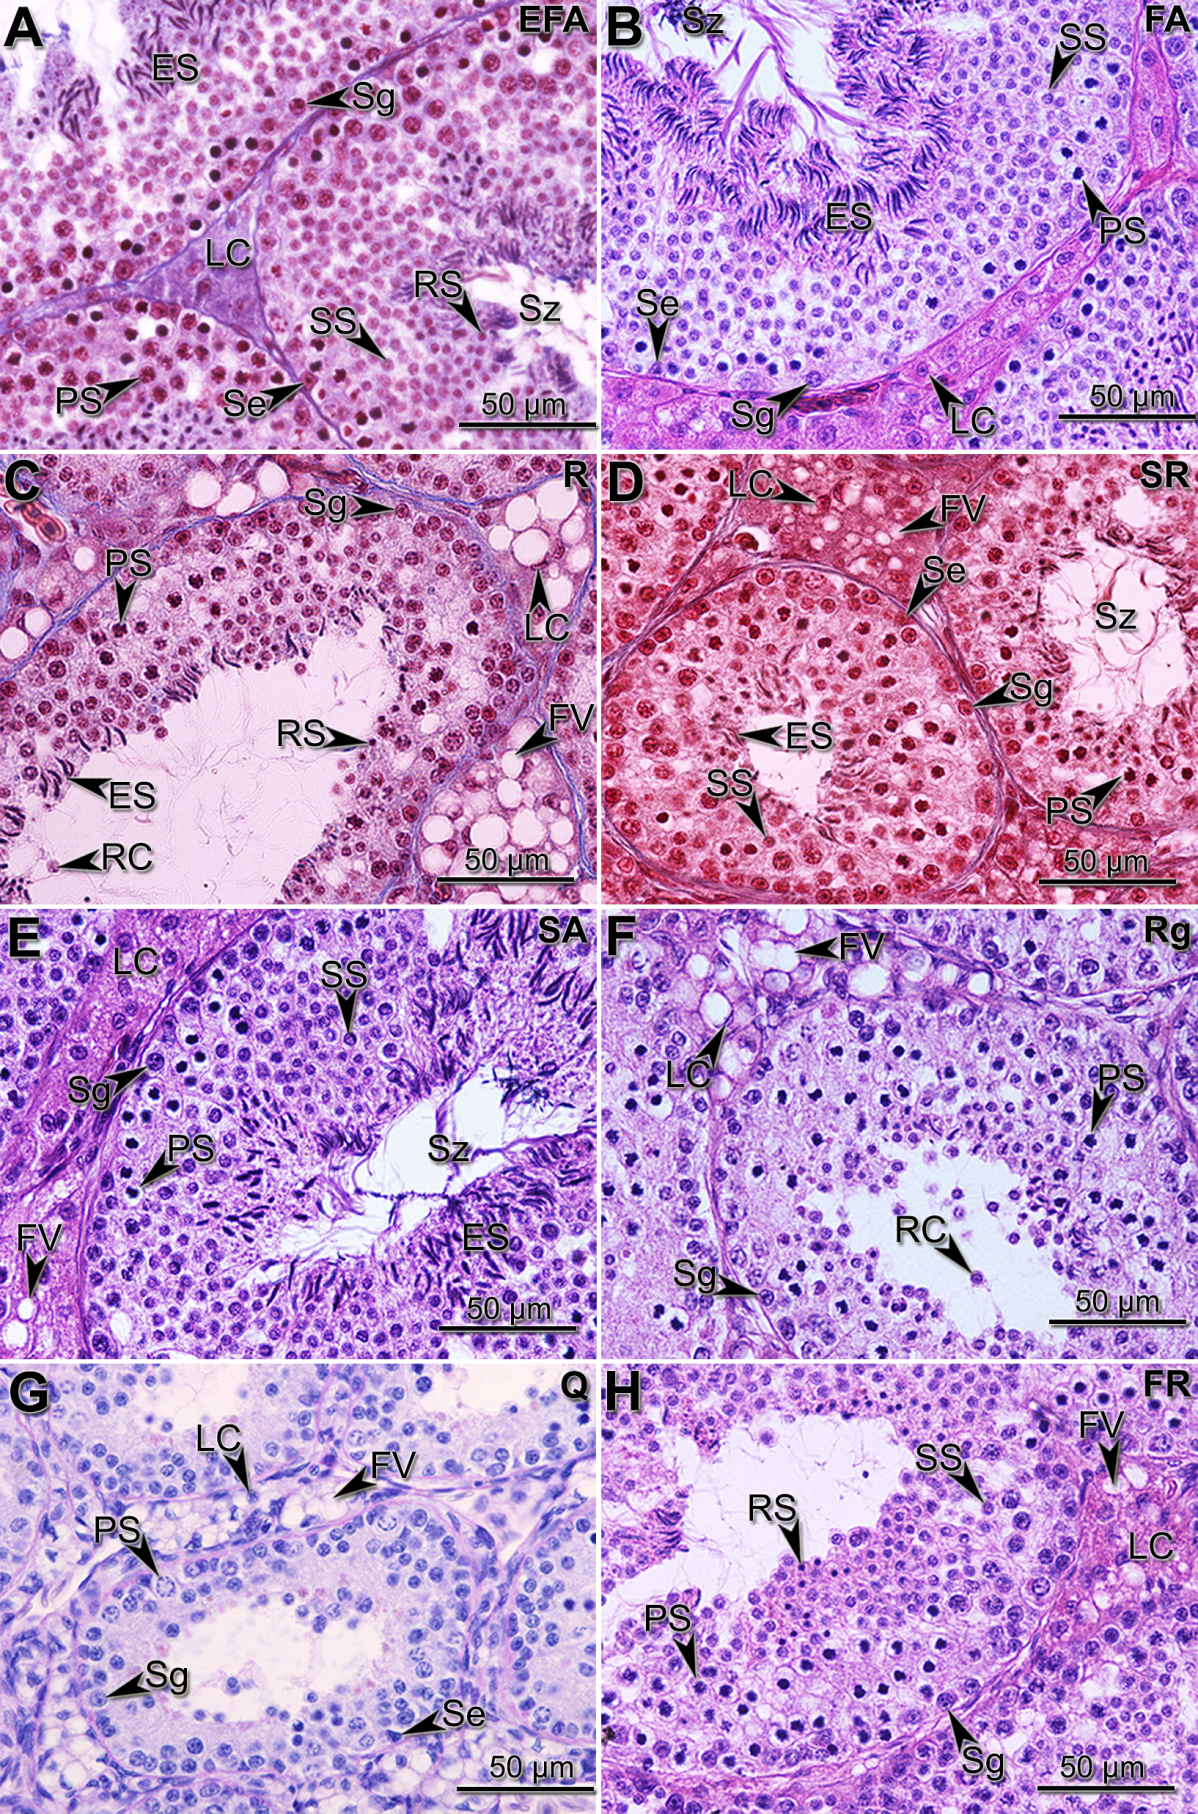


**Fig. S1**

**
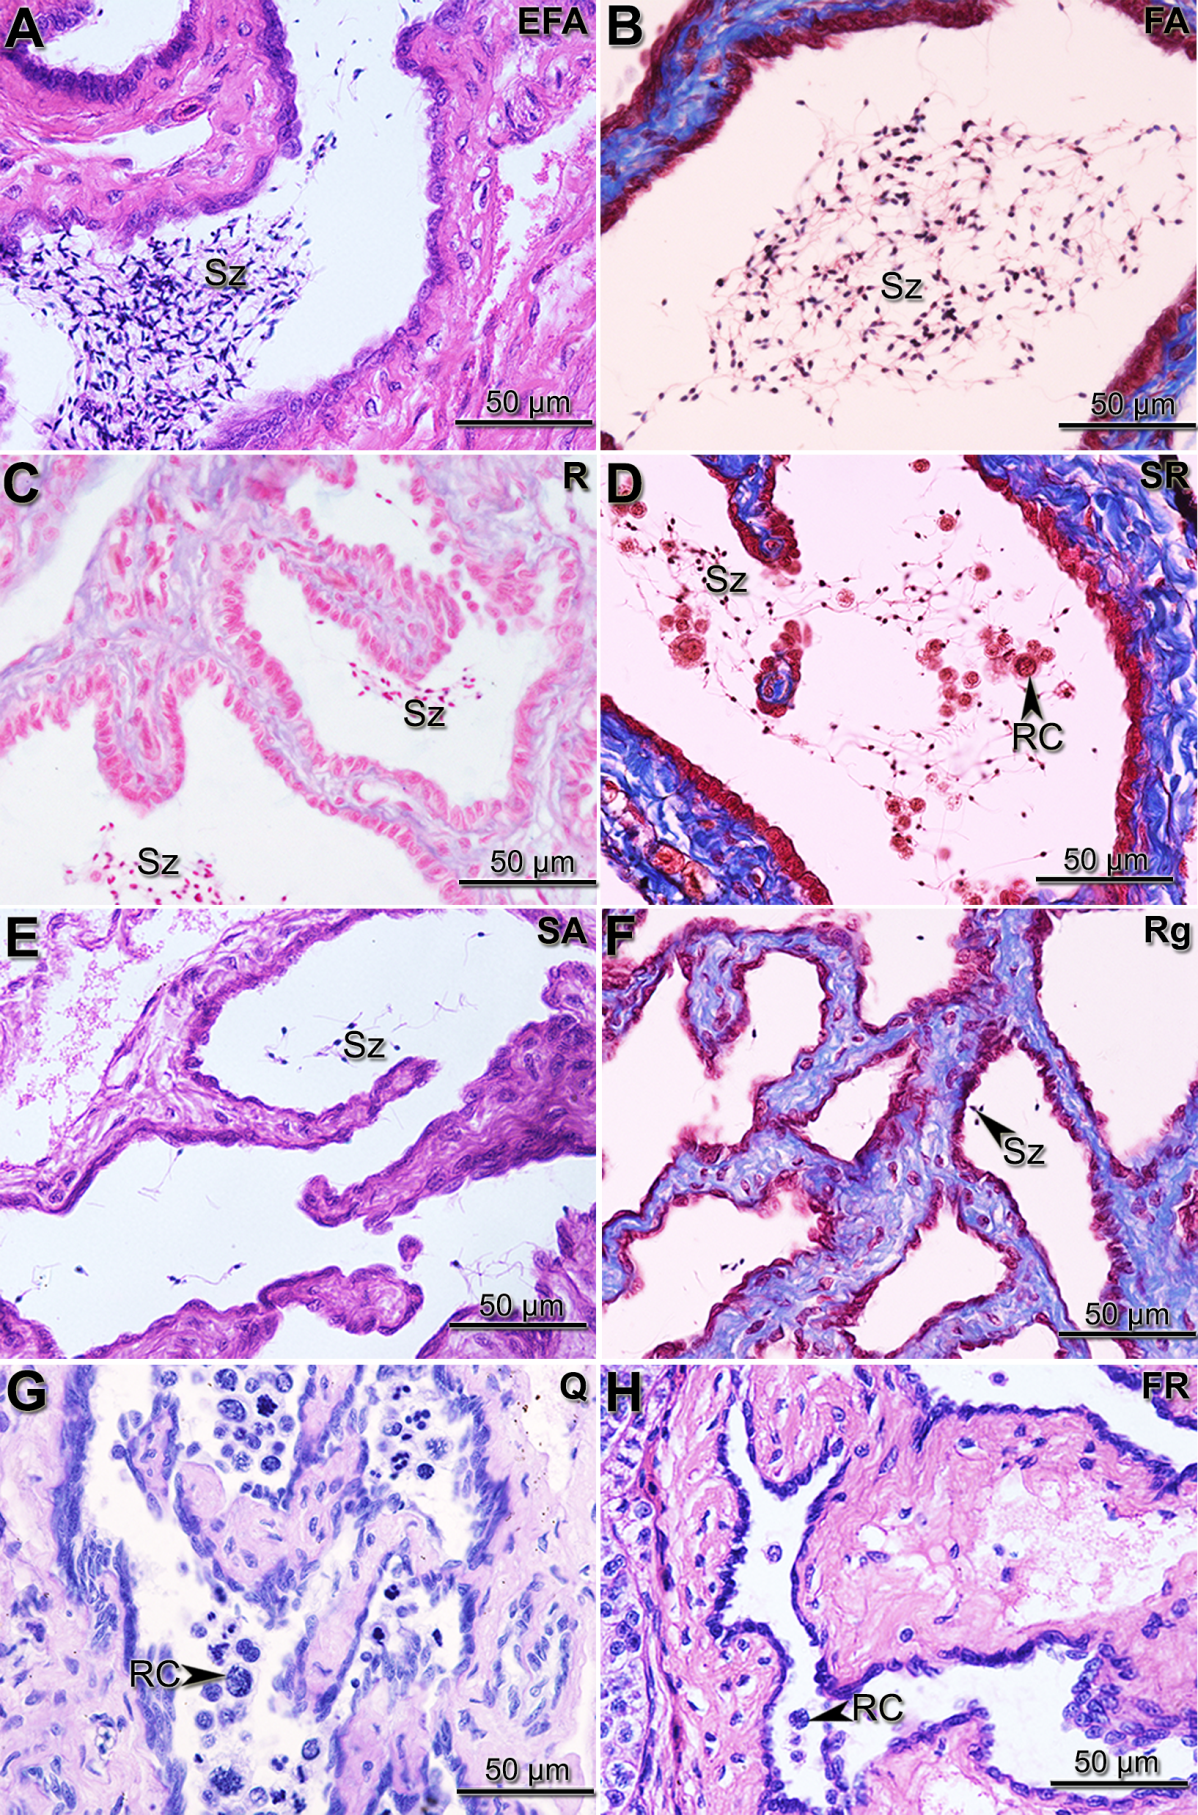
**

**Fig. S2**


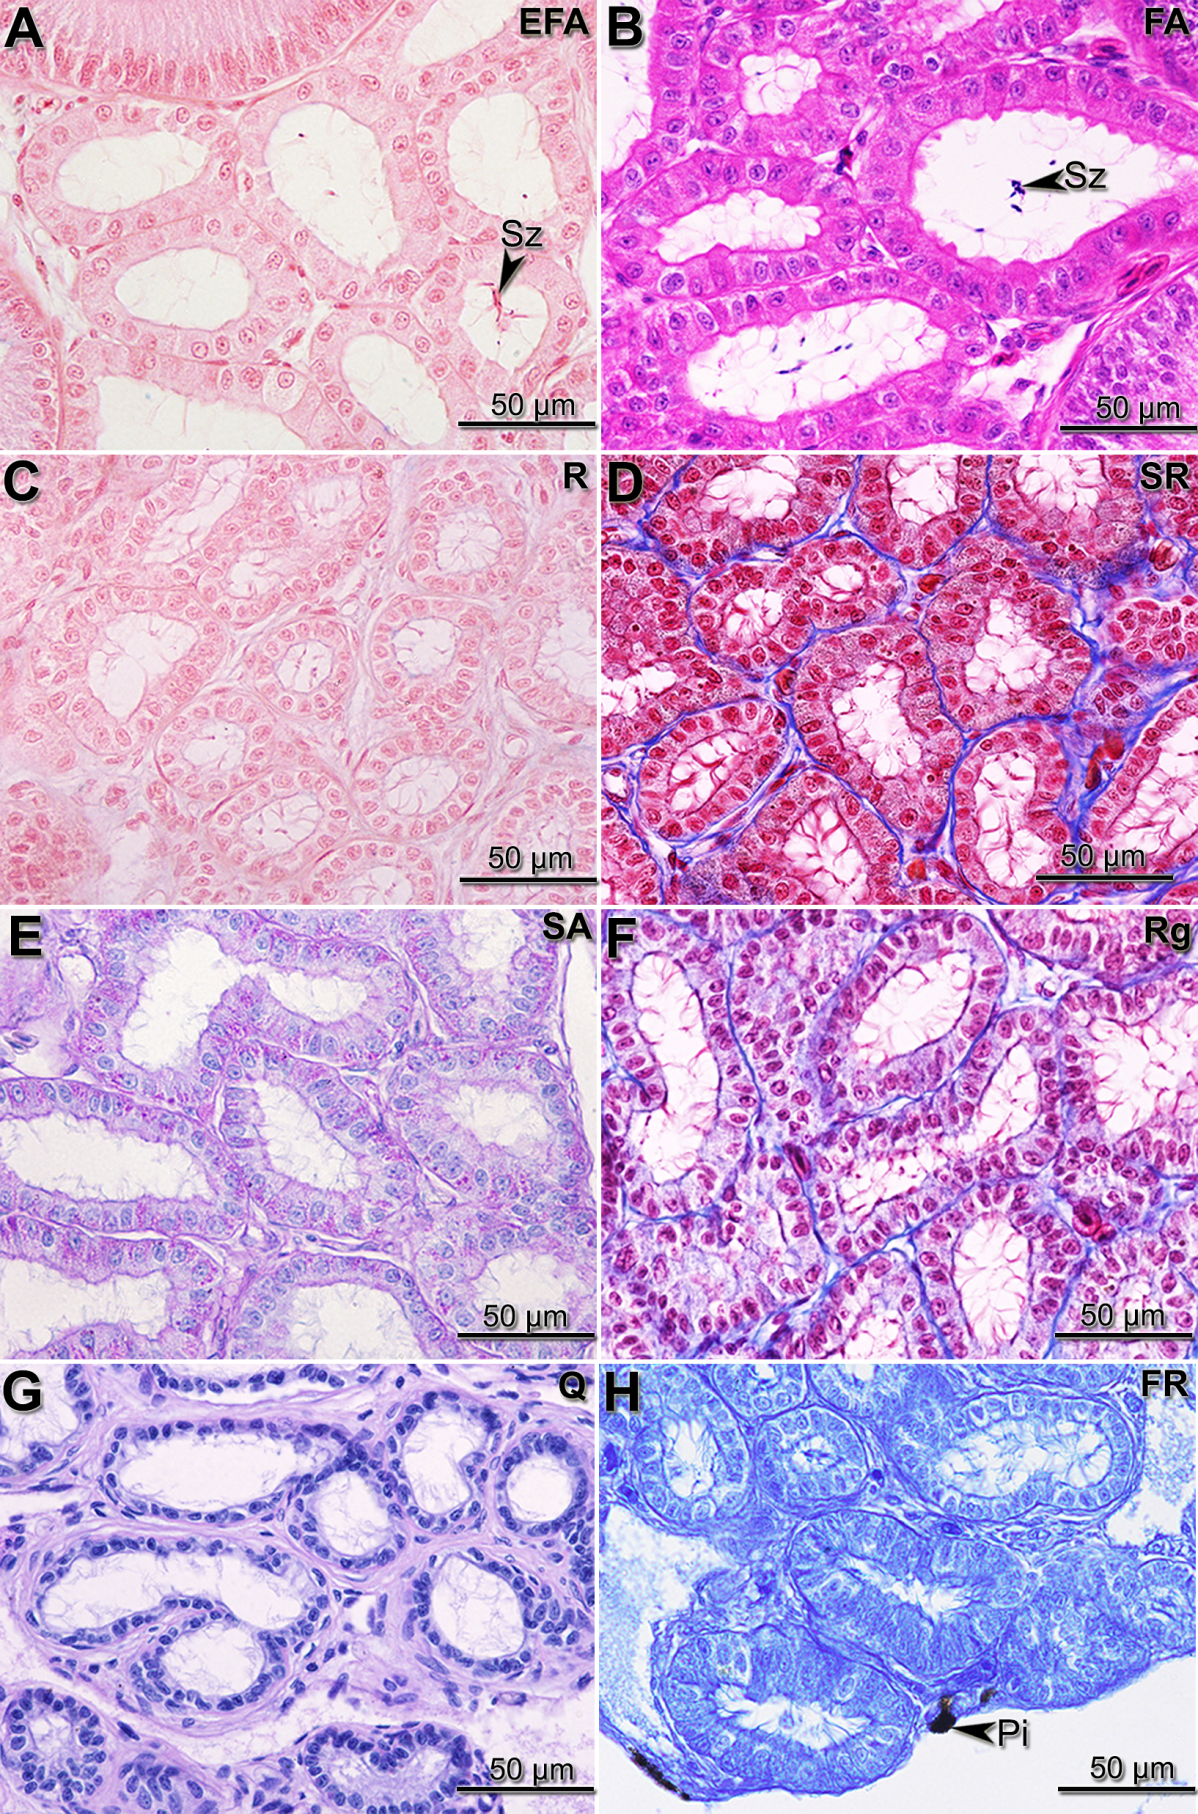


**Fig. S3**


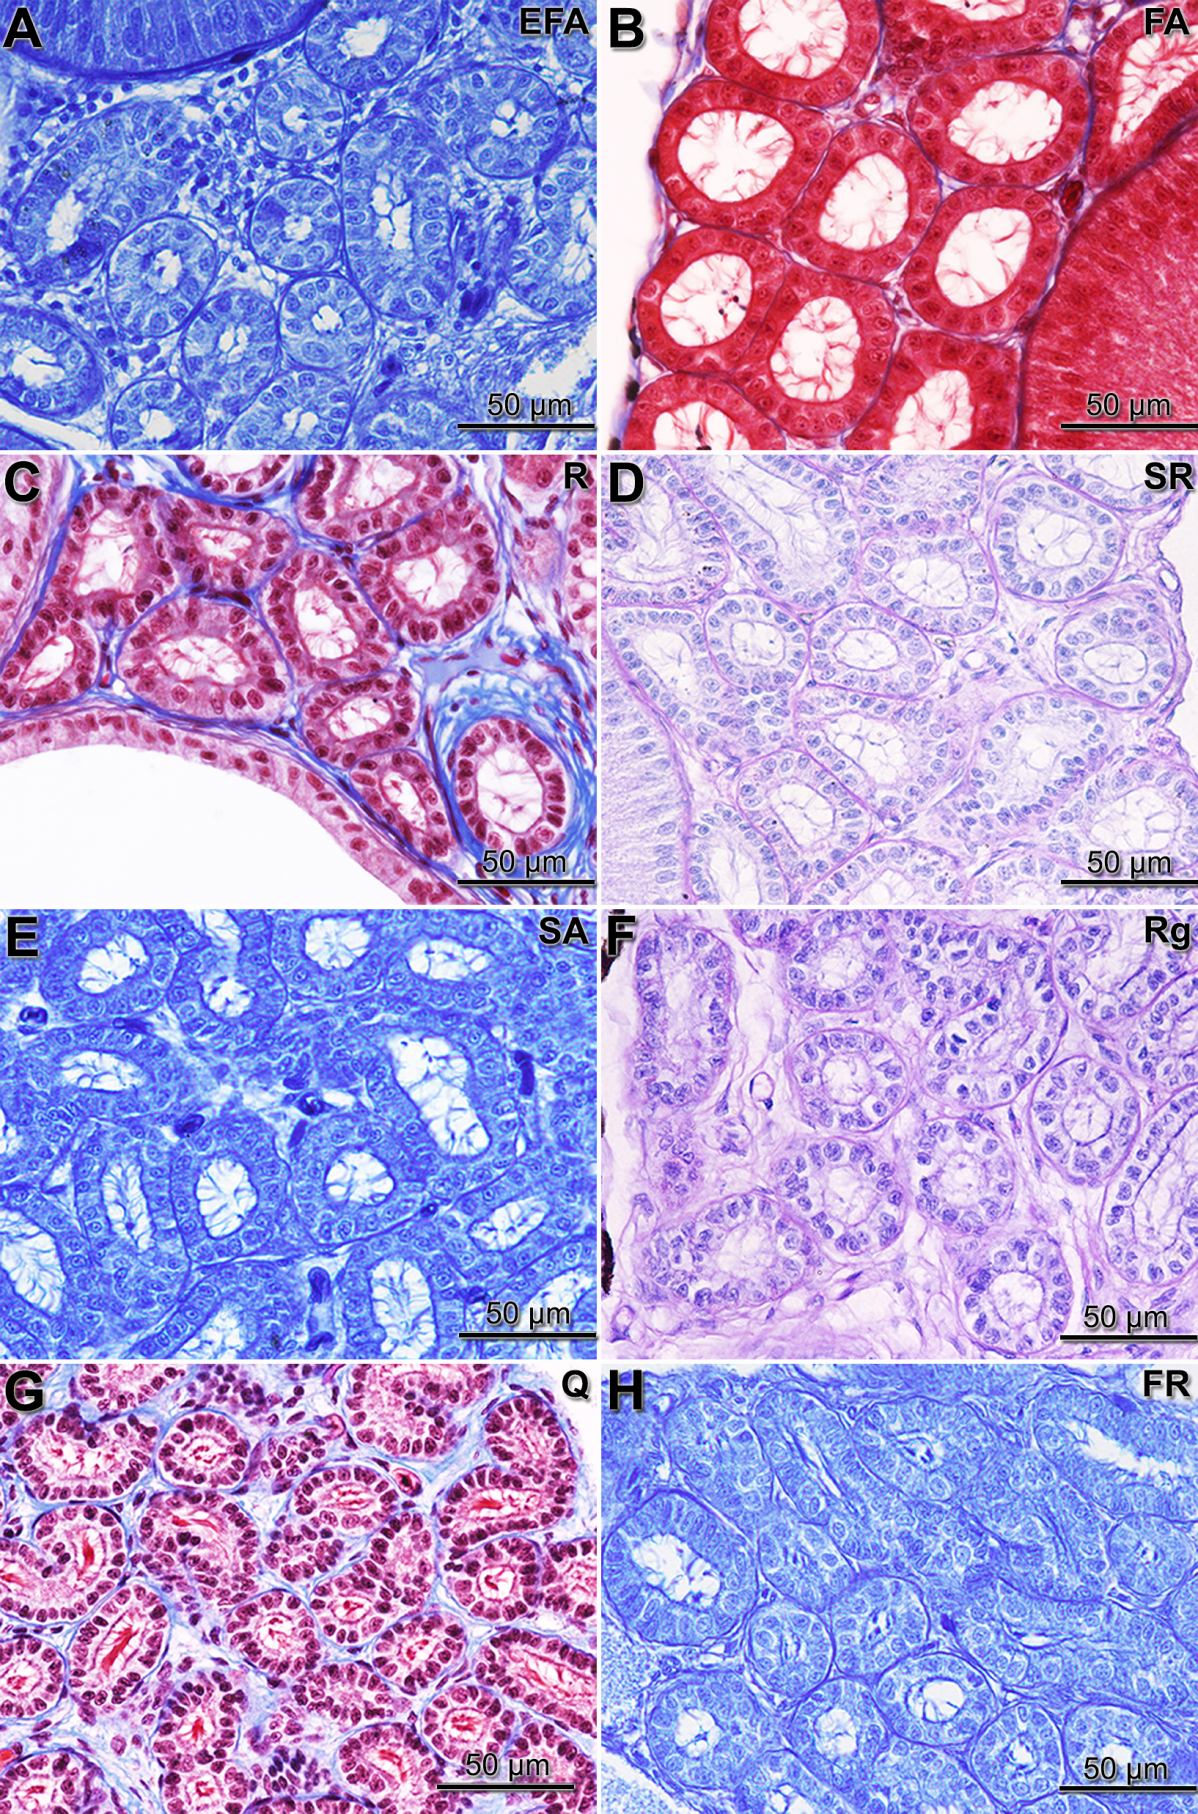


**Fig. S4**


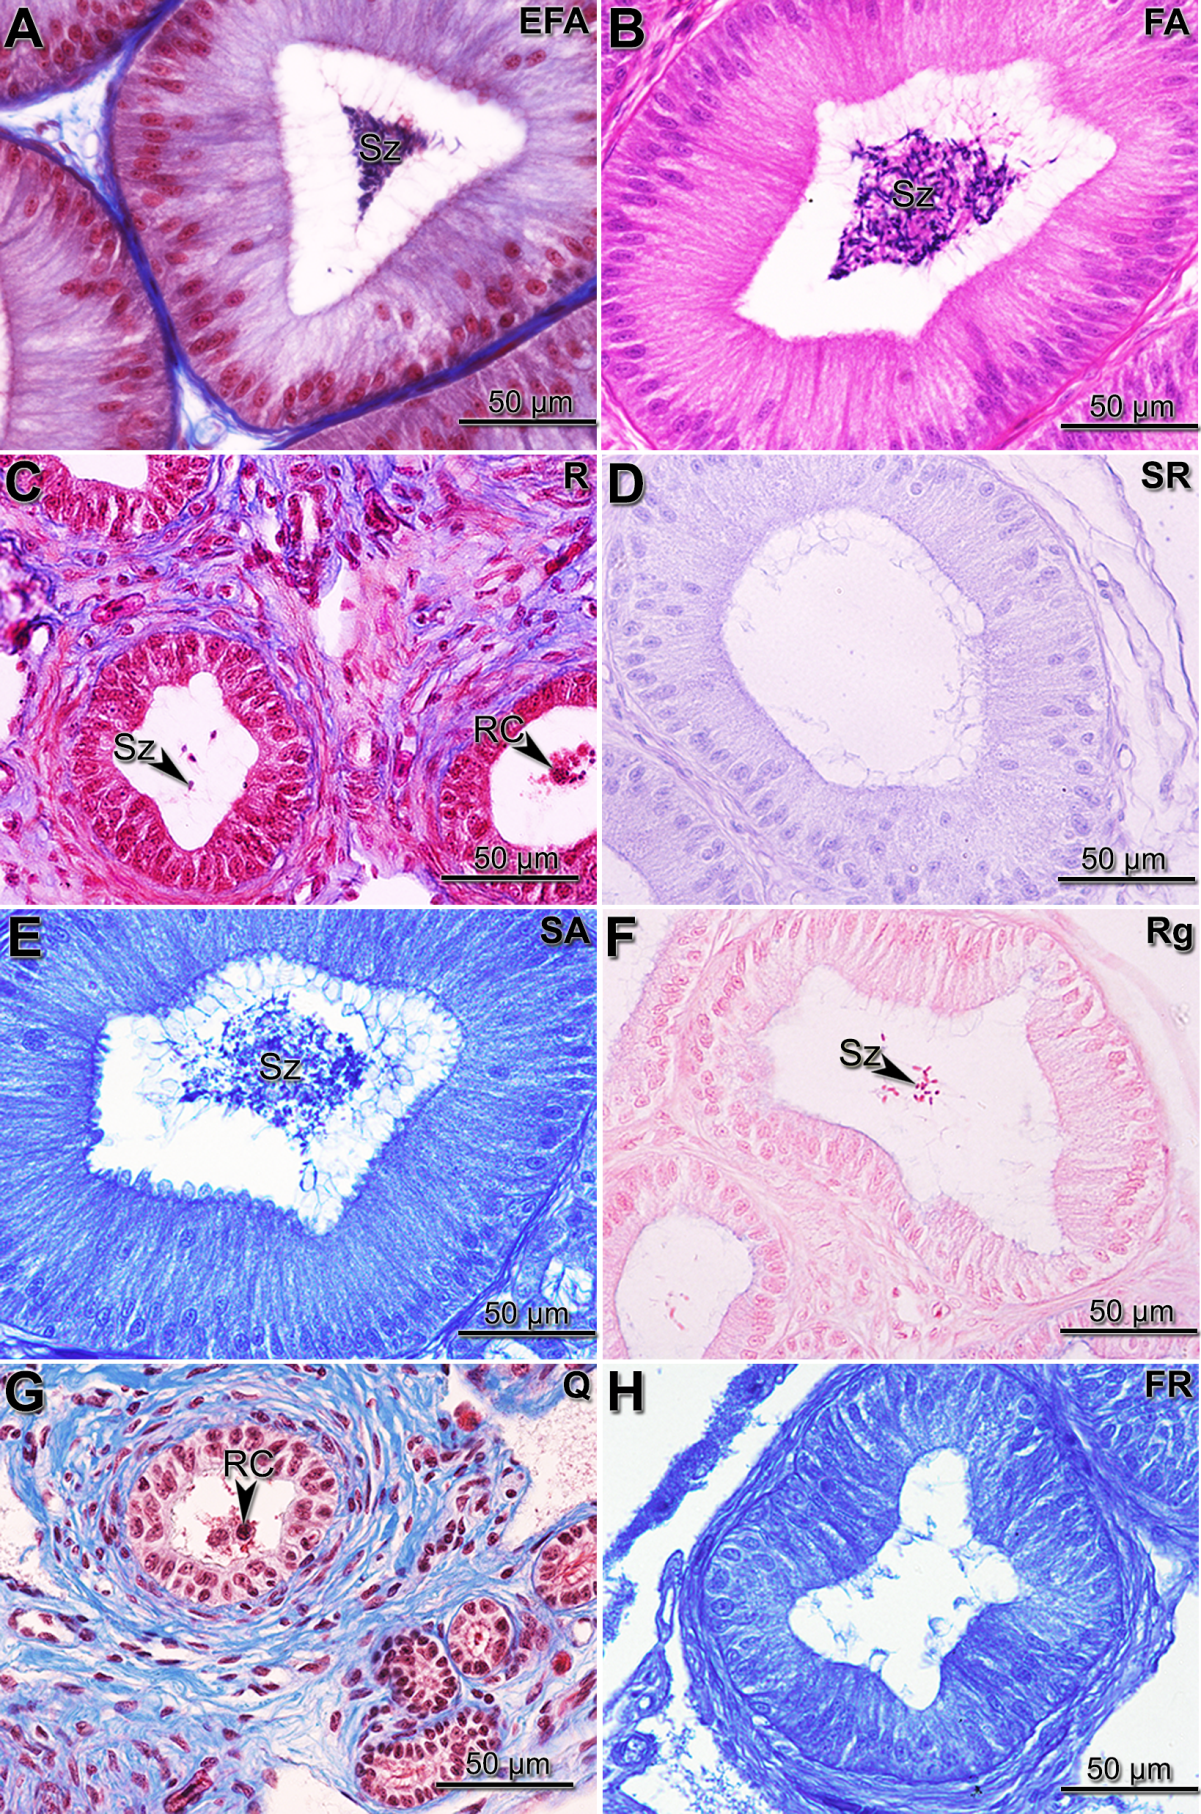


**Fig. S5**


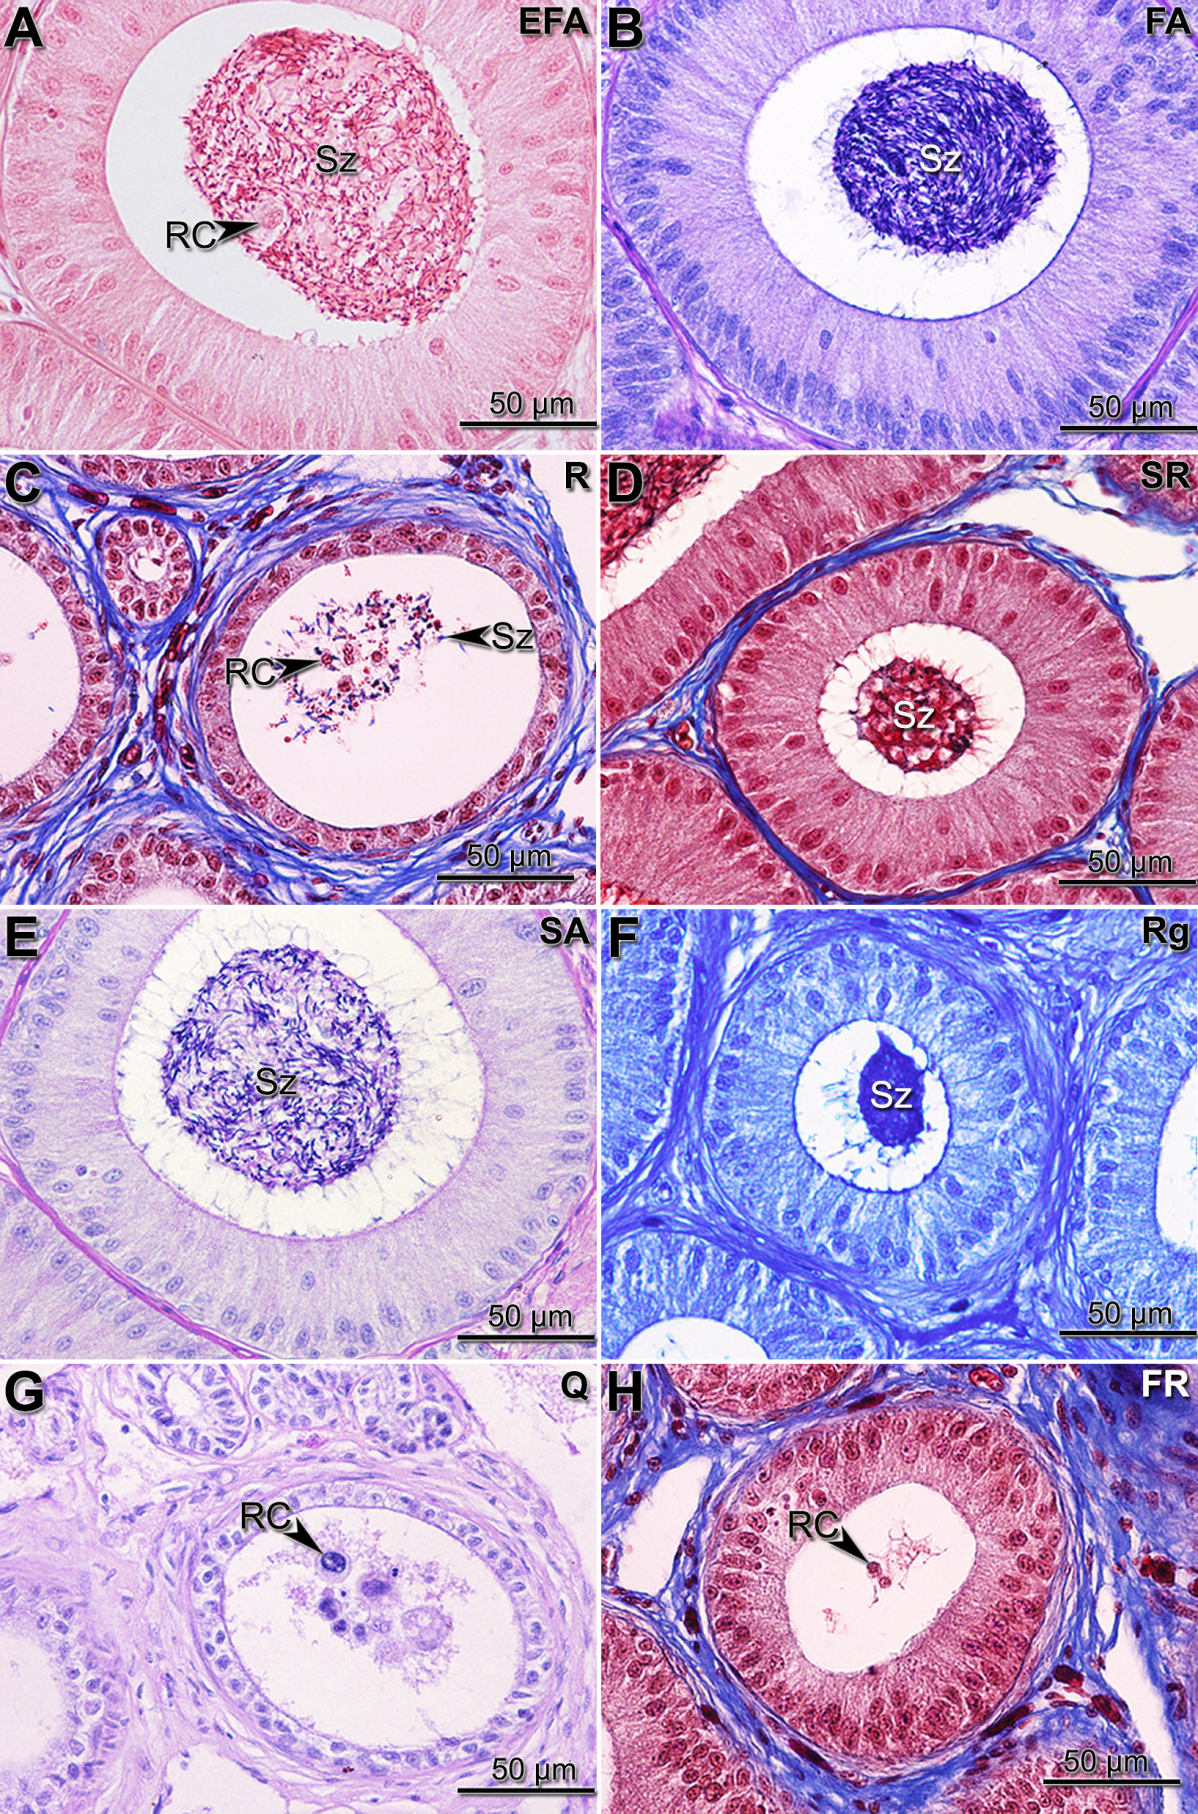


**Fig. S6**


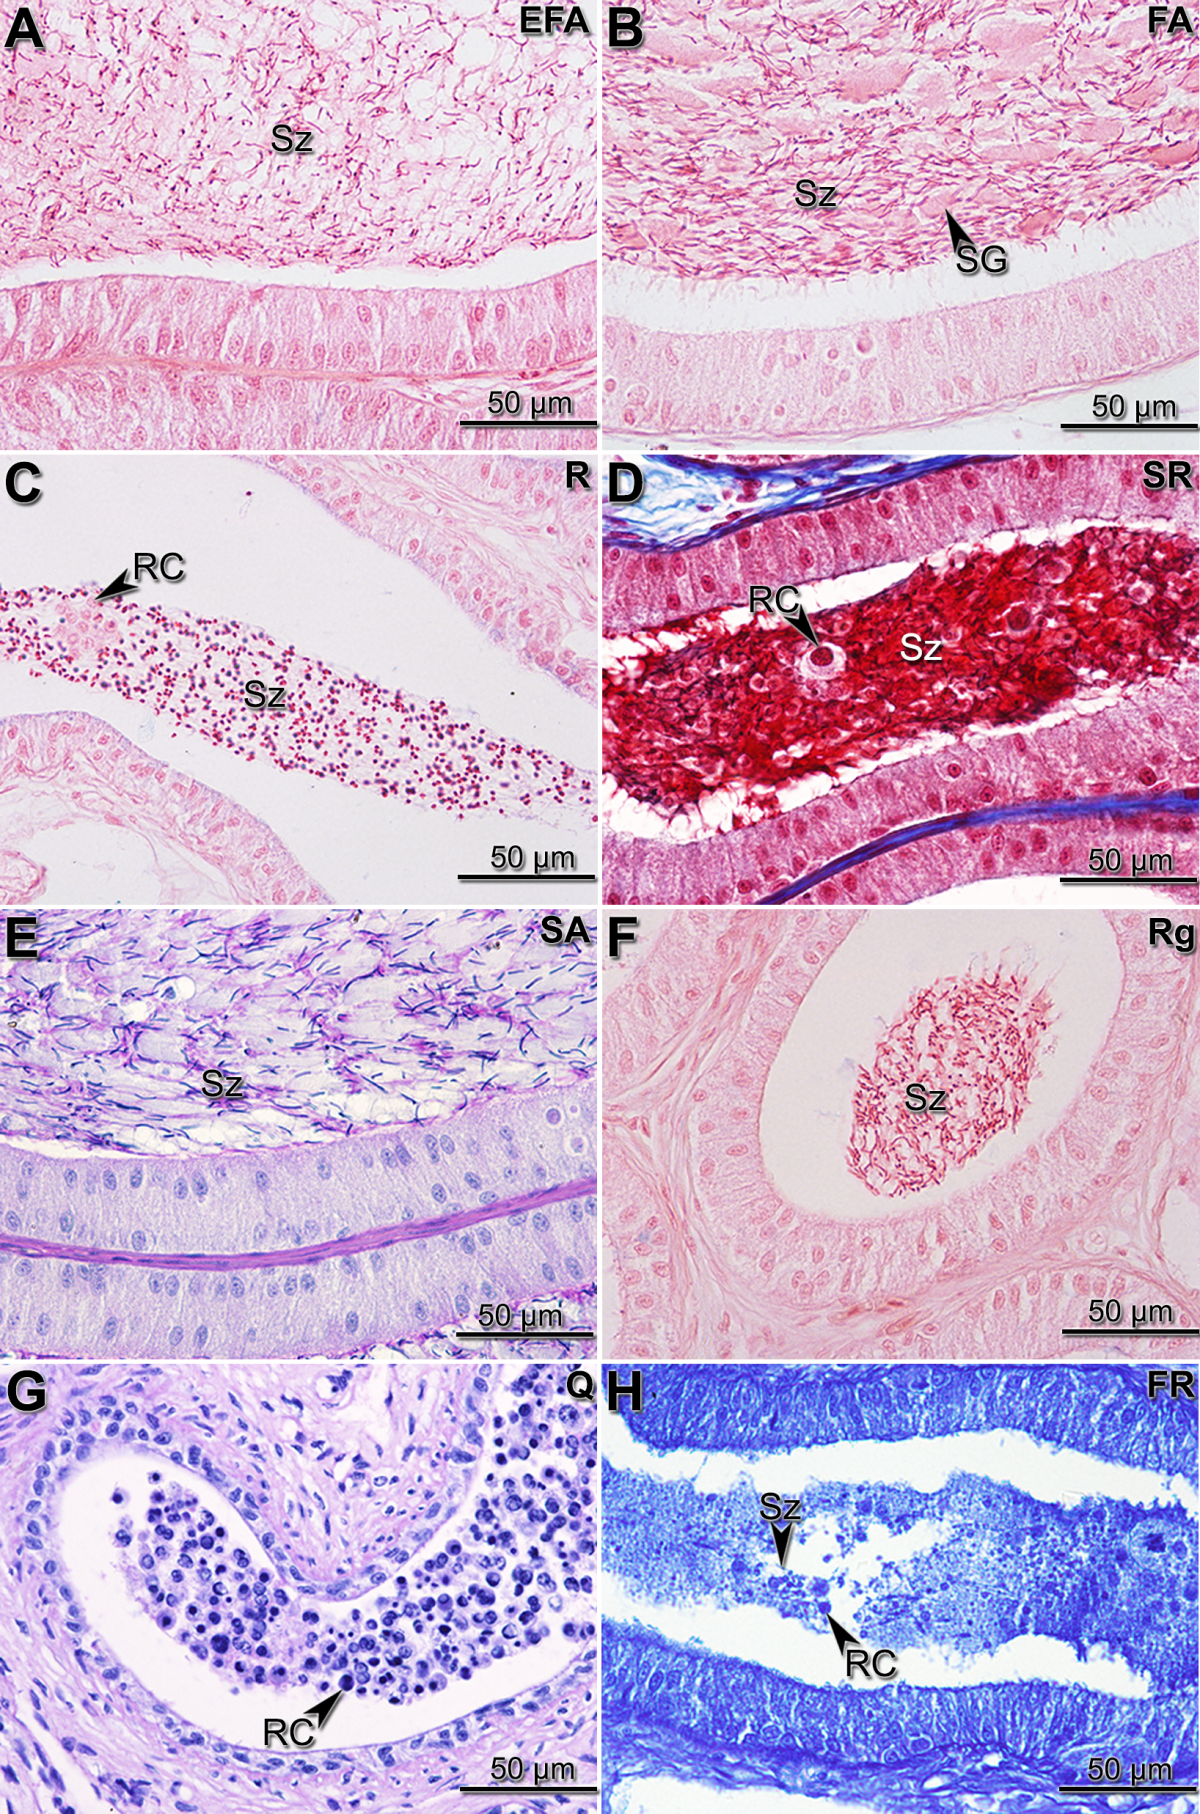


**Fig. S7**


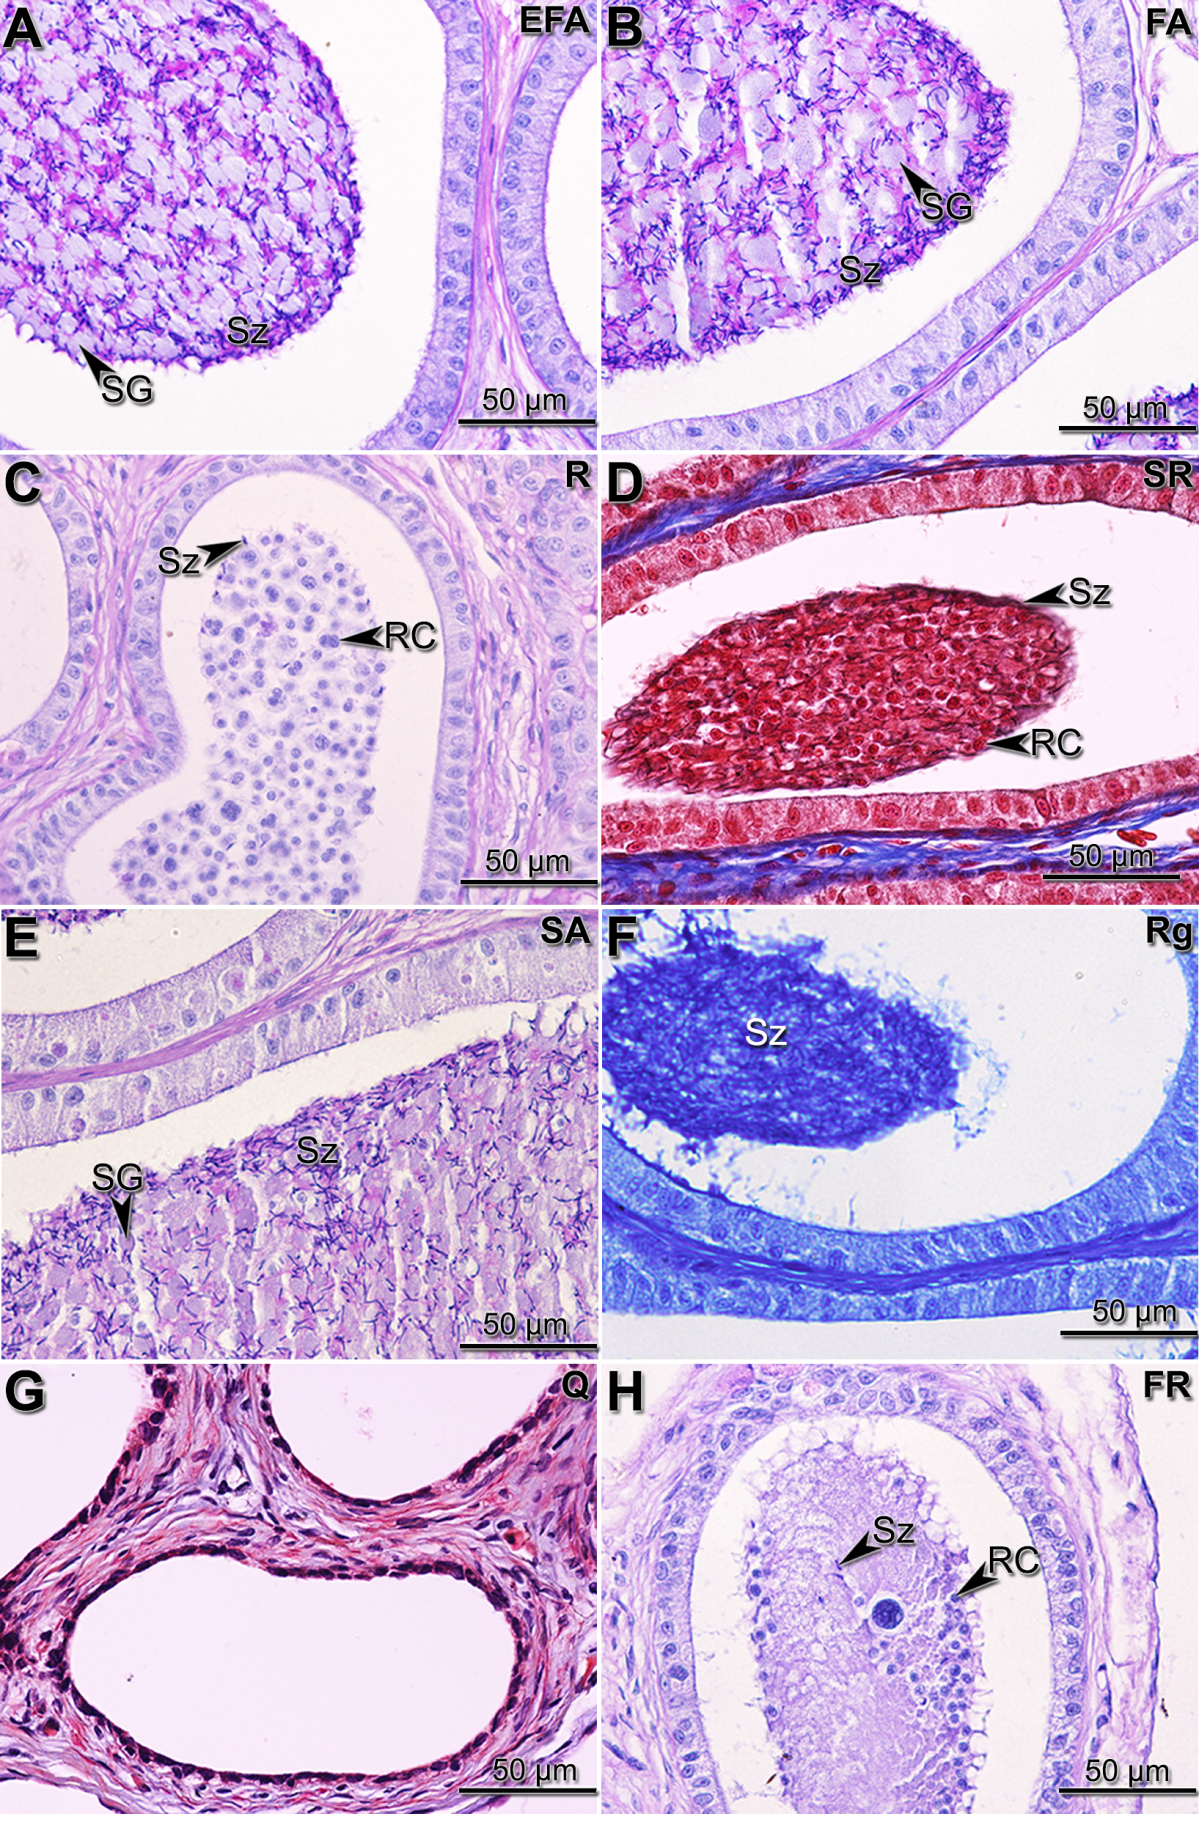


**Fig. S8**


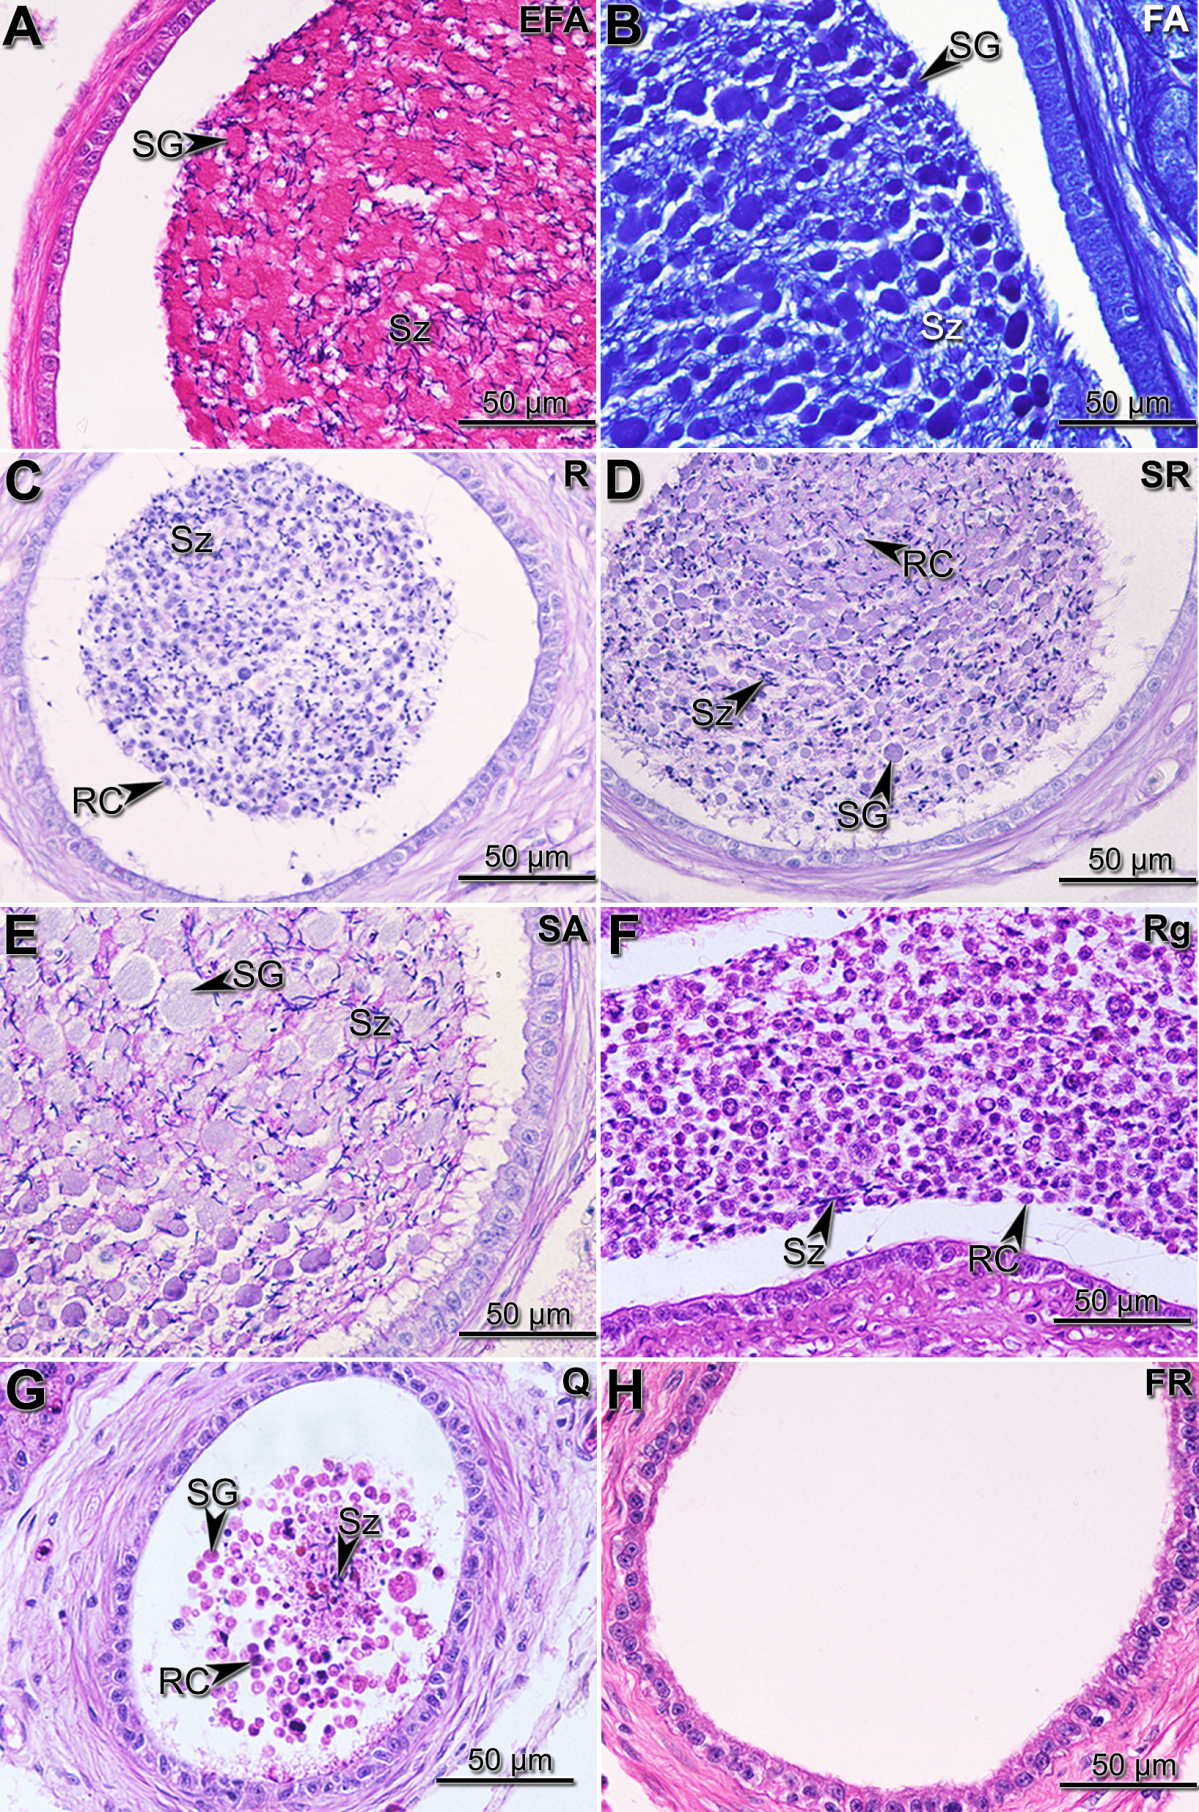


**Fig. S9**


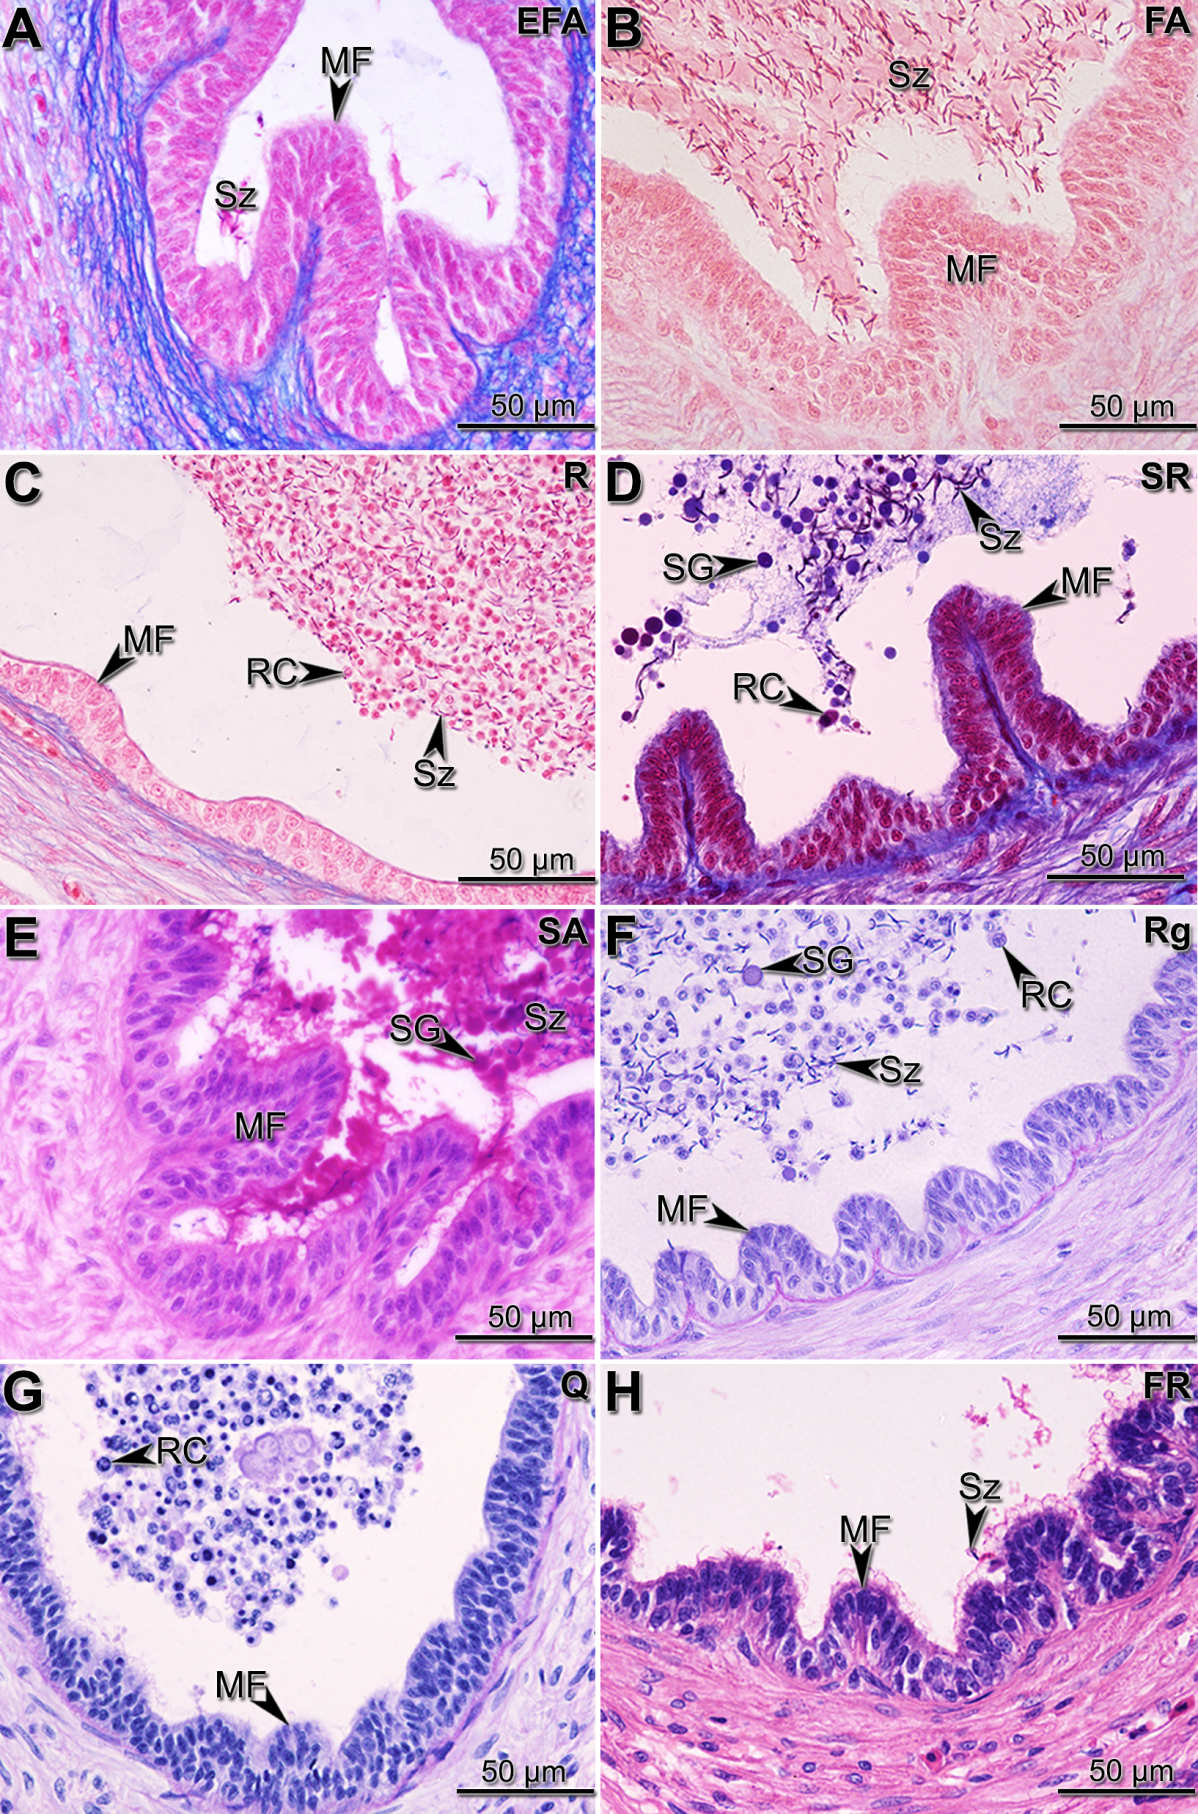


**Fig. S10**
